# Supplementary material for: Selective inhibition of arginase-2 in endothelial cells but not proximal tubules reduces renal fibrosis
Source: JCI journal article supplement (doi:10.1172/jci.insight.142187), 2020-09-17
Supplement: sd1 [file 1]

You are being redirected.
