# Supplementary material for: Selective inhibition of arginase-2 in endothelial cells but not proximal tubules reduces renal fibrosis
Source: JCI journal article supplement (doi:10.1172/jci.insight.142187), 2020-09-17
Supplement: sd1 [file 1]

**Supplemental Table 1: Blood pressure measurement on transgenic mice.**

| Mouse type                                     | Systolic blood pressure (mmHg) |
|------------------------------------------------|--------------------------------|
| Arg2 <sup>flox/flox</sup>                      | 104.99 ± 15.95                 |
| Ggt1 <sup>Cre</sup> /Arg2 <sup>flox/flox</sup> | 89.54 ± 4.02                   |
| Arg2 <sup>flox/flox</sup>                      | 116.83 ± 3.15                  |
| Tie2 <sup>Cre</sup> /Arg2 <sup>flox/flox</sup> | 117.14 ± 4.02                  |

Systolic blood pressure was measured on Arg2<sup>flox/flox</sup>, Ggt1<sup>Cre</sup>/Arg2<sup>flox/flox</sup>, and Tie2<sup>Cre</sup>/Arg2<sup>flox/flox</sup> mice. (n=4 each group). Values are means ± SEM, analyzed using unpaired t-test.

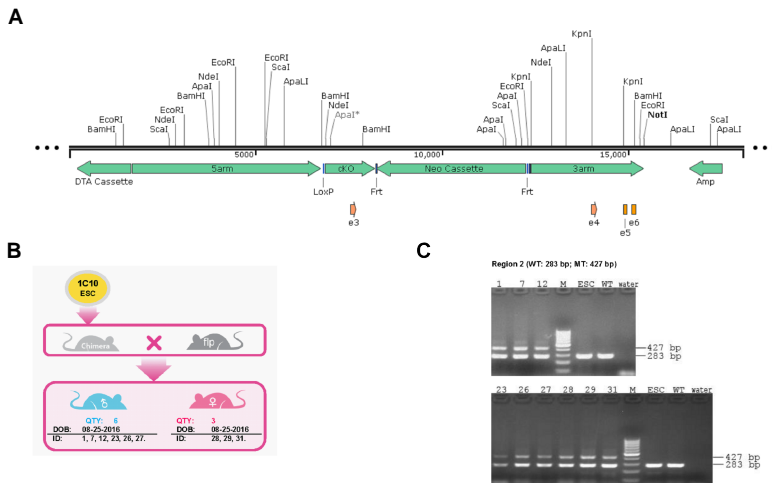

**Supplemental Fig. 1: Generation of *Arg2<sup>fllox/fllox</sup>* mice.** (A) Design for insertion of LoxP sites into *Arg2* gene. (B) Embryonic stem (ES) cells were implanted into a chimeric mouse and crossed with flp delete mouse to get *Arg2<sup>fllox/WT</sup>* offspring. (C) *Arg2<sup>fllox/WT</sup>* was confirmed by PCR analysis of 2 flox region deletion sites at 427 (mutant) and 283 (WT) bp.

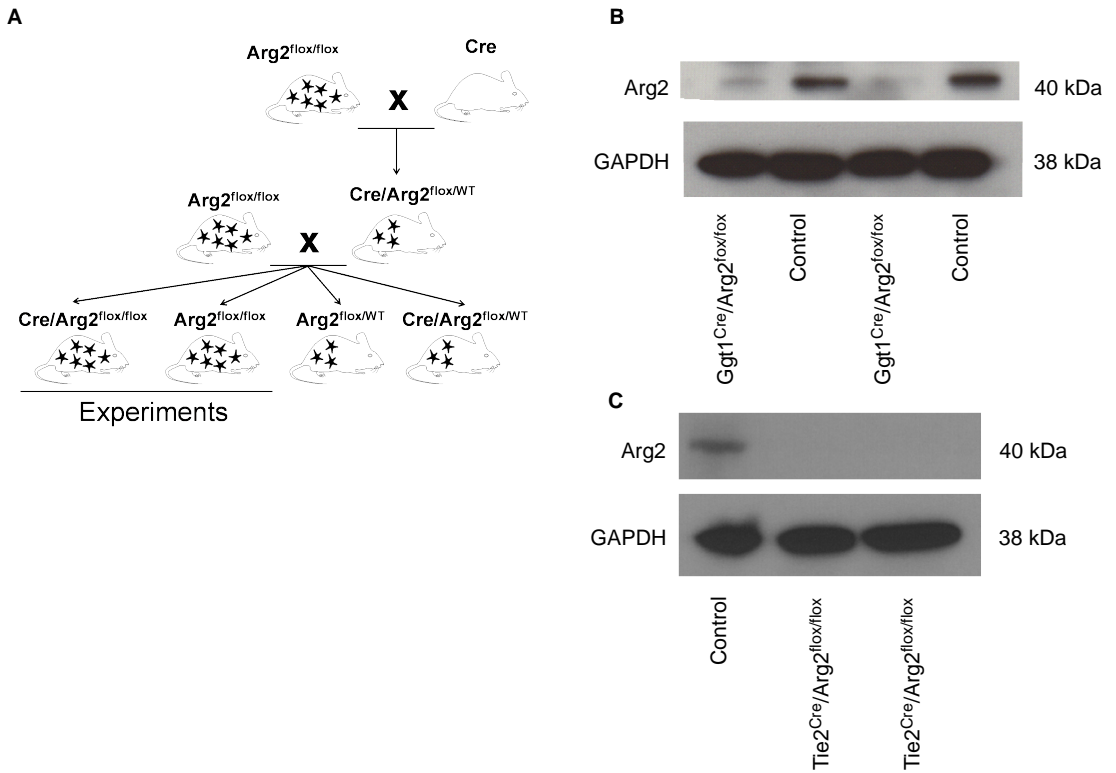

**Supplemental Fig. 2: Generation and confirmation of  $Ggt1^{Cre}/Arg2^{flox/flox}$  and  $Tie2^{Cre}/Arg2^{flox/flox}$  mice.** (A)  $Arg2^{flox/flox}$  mice were cross-bred with  $Ggt1^{Cre}$  and  $Tie2^{Cre}$  mice for 2 generation to obtain  $Ggt1^{Cre}/Arg2^{flox/flox}$  and  $Tie2^{Cre}/Arg2^{flox/flox}$ , respectively. (B-C) Western blot analysis of Arg2 expression in isolated proximal tubules and endothelial cells from  $Ggt1^{Cre}/Arg2^{flox/flox}$  and  $Tie2^{Cre}/Arg2^{flox/flox}$ . Black stars represent the  $Arg2^{flox/flox}$  status.
